# Supplementary material for: Etching-based transformation of dumbbell-shaped gold nanorods facilitated by hexavalent chromium and their possible application as a plasmonic sensor
Source: Royal Society of Chemistry journal article supplement (doi:10.1039/c5ay00935a), 2015-01-01
Supplement: c5ay00935a1.pdf [file c5ay00935a1.pdf]

## **Etching-based transformation of dumbbell-shaped Gold nanorods facilitated by hexavalent chromium and their possible application as a plasmonic sensor**

Sruthi Ann Alex<sup>a</sup>, Jitendra Satija<sup>b</sup>, Mohd Azeem Khan<sup>a</sup>, Gopalkrishna M. Bhalerao<sup>c</sup>, Sujay Chakravarty<sup>c</sup>, Boobalan Kasilingam<sup>d</sup>, A. Sivakumar<sup>d</sup>, N. Chandrasekaran<sup>a</sup>, Amitava Mukherjee<sup>a\*</sup>

<sup>a</sup>Centre for Nanobiotechnology, VIT University, Vellore, India.

<sup>b</sup>School of Biosciences and Technology, VIT University, Vellore, India.

<sup>c</sup>UGC-DAE CSR, Kalpakkam Node, Kokilamedu, India.

<sup>d</sup>School of Advanced Sciences, VIT University, Vellore, India.

### **Supplementary Information**

**\*Corresponding author**

**Dr. Amitava Mukherjee**

**Senior Professor & Deputy Director**

**Centre for Nanobiotechnology**

**VIT University, Vellore - 632014**

**Email: [amit.mookerjea@gmail.com](mailto:amit.mookerjea@gmail.com)**

**Phone: 91 416 2202620**

**Fax: 91-416-2243092**

**Figure S1 (a) to (e):** UV–visible spectral changes (blue-shift) and variation in color [right inset figure] of AuNR solution after addition of various concentrations of Cr(VI) [0, 5, 10, 100, and 1000  $\mu\text{M}$ , respectively].

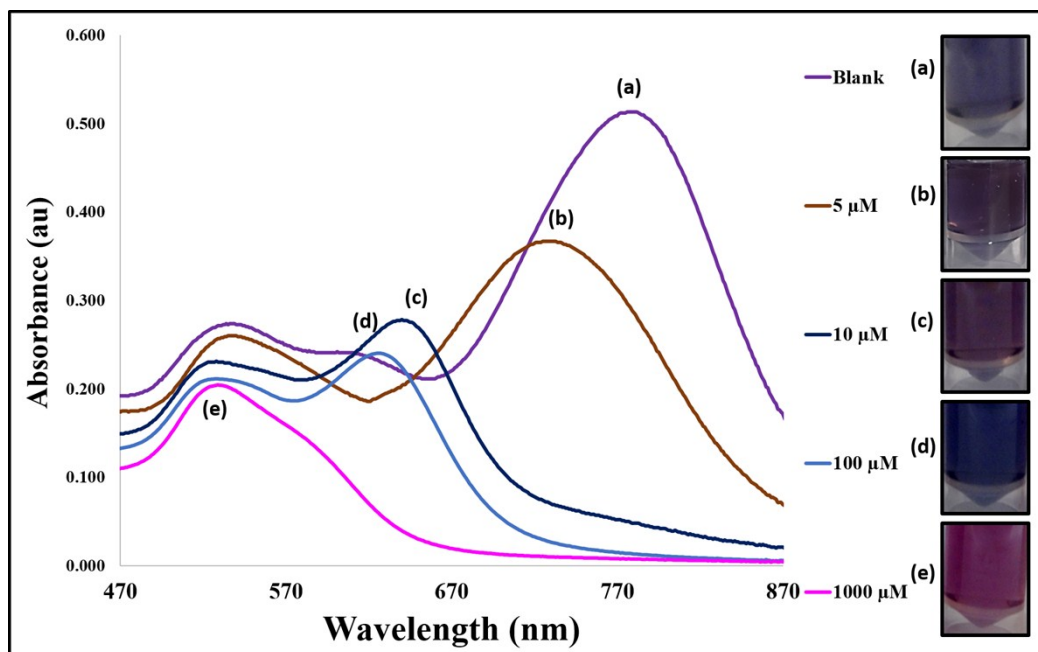

**Figure S2:** XRD analysis performed for control AuNRs and AuNRs after interaction with the lowest (5  $\mu\text{M}$ ) and highest concentrations (1000  $\mu\text{M}$ ) of Cr(VI).

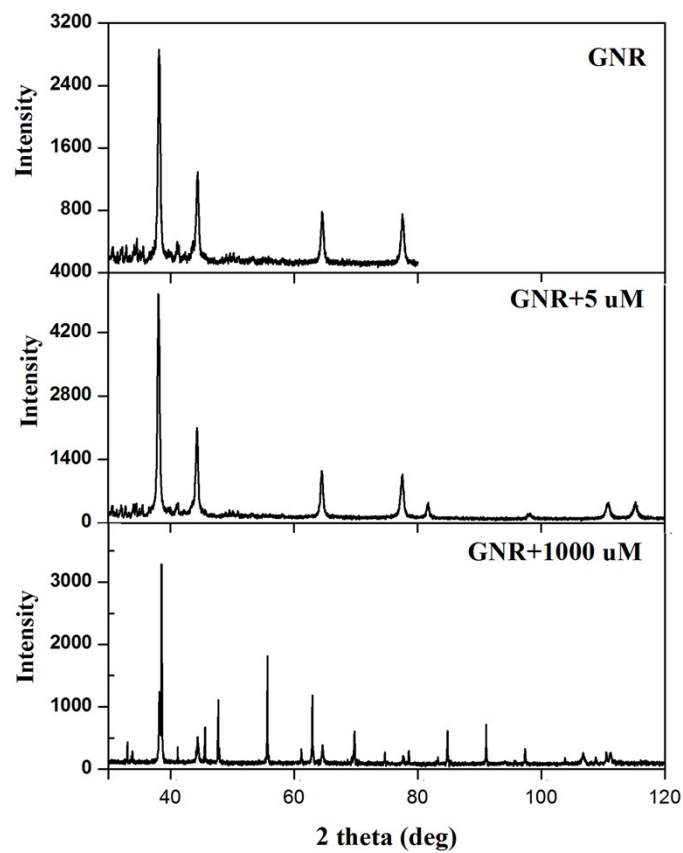

Au peaks correspond to JCPDS data (JCPDS No. 00-004-0784)

Cr peaks correspond to JCPDS data (JCPDS No. 00-006-0694)

The presence of chromium is observed only for AuNRs interacted with 1000  $\mu\text{M}$  of Cr(VI)

**Figure S3:** Stability of signal ( $\Delta\lambda_{\max}$ ) over time for AuNRs after interaction with Cr(VI) [5, 10, 100, and 1000  $\mu\text{M}$ ]

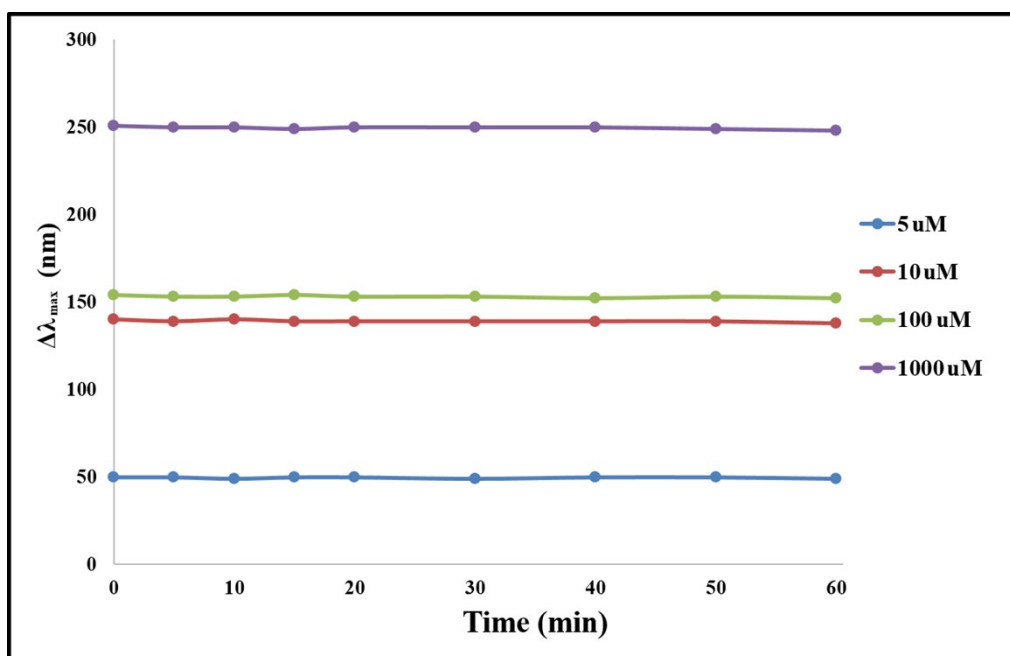

**Table S1:** Calculation of breadth measurements from TEM images.

| <b>Samples</b>       | <b>D1<sup>a</sup></b><br><b>(nm)</b> | <b>D2<sup>b</sup></b><br><b>(nm)</b> | <b>D3<sup>b</sup></b><br><b>(nm)</b> | <b>Average Breadth</b><br><b>(nm)</b> |
|----------------------|--------------------------------------|--------------------------------------|--------------------------------------|---------------------------------------|
| GNR as such          | 17.63 ± 2.14                         | 25.35 ± 3.42                         | 24.72 ± 1.79                         | 22.57 ± 2.45                          |
| GNR + 5 μM Cr(VI)    | 20.62 ± 2.19                         | 24.01 ± 2.38                         | 23.82 ± 1.61                         | 22.82 ± 2.06                          |
| GNR + 10 μM Cr(VI)   | 23.32 ± 2.97                         | 23.29 ± 1.48                         | 22.86 ± 1.65                         | 23.16 ± 2.03                          |
| GNR + 100 μM Cr(VI)  | 23.67 ± 2.90                         | 24.33 ± 1.54                         | 23.91 ± 1.79                         | 23.97 ± 2.08                          |
| GNR + 1000 μM Cr(VI) | 24.87 ± 3.93                         | 24.50 ± 3.61                         | 24.71 ± 3.57                         | 24.69 ± 3.70                          |

a – Length at the center of AuNRs

b – Length at the ends of AuNRs

**Table S2:** Optimization of pH.

| <b>pH</b> | <b>Blank<sup>a</sup></b><br><b>(nm)</b> | <b>Cr (VI) concentration (μM)</b> | <b>λ<sub>max</sub> (nm)</b> | <b>Δλ<sub>max</sub> (nm)</b> |
|-----------|-----------------------------------------|-----------------------------------|-----------------------------|------------------------------|
| pH 0.7    | 760                                     | 1                                 | 757                         | 3                            |
|           |                                         | 10                                | 634                         | 126                          |
|           |                                         | 100                               | 624                         | 136                          |
| pH 1.0    | 768                                     | 1                                 | 758                         | 10                           |
|           |                                         | 10                                | 640                         | 128                          |
|           |                                         | 100                               | 632                         | 136                          |
| pH 1.5    | 771                                     | 1                                 | 771                         | 0                            |
|           |                                         | 10                                | 758                         | 13                           |
|           |                                         | 100                               | 745                         | 26                           |
| pH 2.0    | 776                                     | 1                                 | 775                         | 1                            |
|           |                                         | 10                                | 763                         | 13                           |
|           |                                         | 100                               | 756                         | 20                           |
| pH 2.5    | 779                                     | 1                                 | 777                         | 2                            |
|           |                                         | 10                                | 770                         | 9                            |
|           |                                         | 100                               | 765                         | 14                           |

a : Control samples treated with 1 N HCl alone

**Table S3:** Optimization of incubation temperature.

| Temperature (°C) | Blank <sup>a</sup> (nm) | Cr (VI)<br>concentration (μM) | $\lambda_{\max}$ (nm) | $\Delta\lambda_{\max}$ (nm) |
|------------------|-------------------------|-------------------------------|-----------------------|-----------------------------|
| 50               | 778                     | 10                            | 764                   | 14                          |
| 55               | 775                     |                               | 734                   | 41                          |
| 60               | 771.5                   |                               | 696                   | 75.5                        |
| 65               | 768.5                   |                               | 640                   | 128.5                       |
| 70               | 758                     |                               | 638                   | 120                         |
| 75               | Aggregated              |                               | 635                   | cannot be<br>calculated     |

a : Control samples treated with 1 N HCl alone

**Table S4.** Optimization of GNR : Cr(VI) volume ratio.

| Volume ratio <sup>a</sup> | Blank <sup>b</sup> (nm) | $\lambda_{\max}$ (nm) | $\Delta\lambda_{\max}$ (nm) |
|---------------------------|-------------------------|-----------------------|-----------------------------|
| VR 1:4                    | Aggregated              | Aggregated            | –                           |
| VR 2:7                    | Aggregated              | Aggregated            | –                           |
| VR 1:3                    | 750                     | 644                   | 106                         |
| VR 2:5                    | 755                     | 645                   | 110                         |
| VR 1:2                    | 767                     | 640                   | 127                         |
| VR 4:7                    | 767                     | 659                   | 108                         |
| VR 2:3                    | 768                     | 678.5                 | 89.5                        |
| VR 4:5                    | 769.5                   | 705.5                 | 64                          |
| VR 1:1                    | 770.5                   | 743.5                 | 27                          |
| VR 3:2                    | 774                     | 771.5                 | 2.5                         |
| VR 2:1                    | 775                     | 773.5                 | 1.5                         |
| VR 5:2                    | 776                     | 774                   | 2                           |
| VR 3:1                    | 777.5                   | 774.5                 | 3                           |
| VR 7:2                    | 778.5                   | 776                   | 2.5                         |
| VR 4:1                    | 779                     | 776.5                 | 2.5                         |

a – Volume ratio of gold nanorods : Cr(VI)    b : Control samples treated with 1 N HCl alone

**Table S5:** Statistical performance of the analysis for Cr (VI) detection.

| <b>Concentration (<math>\mu\text{M}</math>)</b> | <b>RSD %</b>                  |                               |                                   |
|-------------------------------------------------|-------------------------------|-------------------------------|-----------------------------------|
|                                                 | <b>Run-to-Run<sup>a</sup></b> | <b>Day-to-Day<sup>b</sup></b> | <b>Batch-to-Batch<sup>c</sup></b> |
| 4                                               | 1.4867                        | 2.5316                        | 2.9482                            |
| 6                                               | 0.8228                        | 1.4184                        | 2.2085                            |
| 8                                               | 0.9569                        | 1.4664                        | 1.9139                            |
| 10                                              | 0.4149                        | 1.0976                        | 1.4994                            |

a : Run-to-run RSDs estimated from three parallel analyses for each concentration.

b : Day-to-day RSDs estimated from three parallel analyses for each concentration.

c : Batch-to-batch RSDs estimated from three parallel analyses for each concentration.
